# Supplementary material for: Bombyx mori β-1,3-Glucan Recognition Protein 4 (BmβGRP4) Could Inhibit the Proliferation of B. mori Nucleopolyhedrovirus through Promoting Apoptosis
Source: MDPI journal article supplement (doi:10.3390/insects12080743), 2021-08-18
Supplement: s1 [file s1]

**Table S1.** The transcriptome data statistics of DEG *BmβGRP4*.

| Gene ID       | Gene Description                                                       | Accession No.  | P50+/P50- |
|---------------|------------------------------------------------------------------------|----------------|-----------|
| BGIBMGA000353 | beta-1,3-glucan recognition protein 4 precursor [ <i>Bombyx mori</i> ] | NM_001166142.1 | 0.014     |

**Table S2.** The primers used in this study.

| Primer name    | Sequence (5'-3')                                      | Purpose            |
|----------------|-------------------------------------------------------|--------------------|
| BmβGRP4-F      | CCGGAATTC* <u>TGCACACCCAGCGTAAC</u> ( <i>EcoR I</i> ) | Protein expression |
| BmβGRP4-R      | CCGCTCGAGTTATAACGCCCAAACCTCG ( <i>Xho I</i> )         |                    |
| OEBmβGRP4-F    | CCGGAATTCATGTGGCTGTAACTCTGGG ( <i>EcoR I</i> )        | Overexpression     |
| OEBmβGRP4-R    | CCGCTCGAGTAACGCCCAAACCTCGAAC ( <i>Xho I</i> )         |                    |
| qBmβGRP4-F     | ACCCAGCGTAACGACAGTGAG                                 | RT-qPCR            |
| qBmβGRP4-R     | TAAAGTGTTTTCTGTGCTGCCAT                               |                    |
| BmGAPDH-F      | CATTCGCGTCCCTGTTGCTAAT                                |                    |
| BmGAPDH-R      | GCTGCCTCCTTGACCTTTTGC                                 |                    |
| VP39-F         | CAACTTTTTCGAAACGACTT                                  |                    |
| VP39-R         | GGCTACACCTCCACTTGCTT                                  |                    |
| qBmApaf1-F     | ACAGTTCACAACCCTCTAAAATCAC                             |                    |
| qBmApaf1-R     | CACTTTCTTACCACGCATCACC                                |                    |
| qBmDredd-F     | TAATAGTCGTTCTGACTTGGGACA                              |                    |
| qBmDredd-R     | TCGGTATGCAATGCAGTTTCT                                 |                    |
| qBmCaspaseNC-F | TTCCCAGCAAATGATAGAACCA                                |                    |
| qBmCaspaseNC-R | ATCAAGGTCACGCACCAAATC                                 |                    |
| qBmICE-F       | CCTCATCCATAAAGGGACCAC                                 |                    |
| qBmICE-R       | CTGCCGACCAACCATAACAAG                                 |                    |
| qBmCaspase1-F  | AAGAGCCACGAGTTGTGTTT                                  |                    |
| qBmCaspase1-R  | TGCCAAGGTGATAAGTTAGA                                  |                    |
| qBmBuffy-F     | TCAGCTATGCTACGCTCAGACA                                |                    |
| qBmBuffy-R     | ATCCATGATCCAGGCTCCTC                                  |                    |
| qBmPTEN-F      | CTGATAGTGGAGAAGGTGCCG                                 |                    |
| qBmPTEN-R      | GTAATGGCCGACGCGCT                                     |                    |
| qBmIAP-F       | TGACGAAAGTTGCTAAAAATGGA                               |                    |
| qBmIAP-R       | GGTGACGGGAGTGTGGATGT                                  |                    |

\* The underline represented restriction enzyme cutting site.

**Table S3.** The siRNA sequences used in this study.

| siRNA name           | Sequence (5'-3')      | Length (bp) |
|----------------------|-----------------------|-------------|
| siBmβGRP4-Sense      | GCCCUAAUAUCGGCGAGUATT | 21          |
| siBmβGRP4-Anti-sense | UACUCGCCGAUAUUAGGGCTT | 21          |
| siNC-Sense           | UUCUCCGAACGUGUCACGUTT | 21          |
| siNC-Anti-sense      | ACGUGACACGUUCGGAGAATT | 21          |
